# Supplementary material
Source: PubMed Central journal article supplement (PMC7474599)
Supplement: pnas.2006382117.sapp.pdf [file pnas.2006382117.sapp.pdf]

Supplementary Information for:

# **Intrinsically disordered linkers control tethered kinases via effective concentration**

Mateusz Dyla<sup>a,b</sup> and Magnus Kjaergaard<sup>a,b,c,d,1</sup>

<sup>a</sup>Department of Molecular Biology and Genetics, Aarhus University, DK-8000 Aarhus, Denmark;

<sup>b</sup>Danish Research Institute of Translational Neuroscience – DANDRITE, Nordic EMBL (European Molecular Biology Laboratory) Partnership for Molecular Medicine, DK-8000 Aarhus, Denmark;

<sup>c</sup>Center for Proteins in Memory - PROMEMO, Danish National Research Foundation, DK-8000 Aarhus, Denmark;

<sup>d</sup>Aarhus Institute of Advanced Studies, AIAS, Aarhus University, DK-8000 Aarhus, Denmark;

<sup>1</sup>To whom correspondence may be addressed. Email: [magnus@mbg.au.dk](mailto:magnus@mbg.au.dk).

## Protein sequences

### Color coding:

- 6xHis-tag
- Thrombin cleavage sequence, // marks the cleavage site
- MBD2 dimerization domain
- p66 $\alpha$  dimerization domain
- GCTAGC (AS) - NheI restriction site
- (GS)<sub>n</sub> - variable-length GS linker; n = 1, 10, 30 or 60
- GGTACC (GT) - KpnI restriction site
- PKA substrate motif, serine residue that becomes phosphorylated is shown in **bold**

### 1. PKAc

MGSSHHHHHHSSGLVPR//GSHMGNAAAAKKGSEQESVKEFLAKAKEDFLKKWETPSQNTAQLDQFDRIKTLGTGSFGRVMLVKHKESGNHYAMKILDQKQVVKLKQIEHTLNEKRILQAVNFPFLVKLEFSFKDNSNLYMVMMEYVAGGEMFSLRRIGRFSEPHARFYAAQIVLTFEYLHSLDLIYRDLKPENLLIDQQGYIQVTDFGFAKRVKGRWTWTLCGTPEYLAP EIILSKGYNKAVDWWALGVLIYEMAAGYPPFFADQPIQIYKIVSGKVRFP SHFSSDLKDLLRNLLQVDLTKRFGNLKNGVNDIKNHKWFATTDWIAIYQRKVEAPFIPKFKGPGDTSNFDDYEEEEIRVSINEKCGKEFTEF

### 2. MBD2-(GS)<sub>n</sub>-PKAc

MGSSHHHHHHSSGLVPR//GSHMVTDEDIRKQEERAQQVRKKLEEALMADAS(GS)<sub>n</sub>GTGNAAA AKKGSEQESVKEFLAKAKEDFLKKWETPSQNTAQLDQFDRIKTLGTGSFGRVMLVKHKESGNHYAMKILDQKQVVKLKQIEHTLNEKRILQAVNFPFLVKLEFSFKDNSNLYMVMMEYVAGGEMFSLRRIGRFSEPHARFYAAQIVLTFEYLHSLDLIYRDLKPENLLIDQQGYIQVTDFGFAKRVKGRWTWTLCGTPEYLAP EIILSKGYNKAVDWWALGVLIYEMAAGYPPFFADQPIQIYKIVSGKVRFP SHFSSDLKDLLRNLLQVDLTKRFGNLKNGVNDIKNHKWFATTDWIAIYQRKVEAPFIPKFKGPGDTSNFDDYEEEEIRVSINEKCGKEFTEF

### 3. p66 $\alpha$ -(GS)<sub>n</sub>-WT substrate

MGSSHHHHHHSSGLVPR//GSHMTSPEERERMIKQLKEELRLEEAKLVLLKCLRQSQIQKEATAQKAS(GS)<sub>n</sub>GTPGSGSGSGSLRRASLGGGGGY

### 4. p66 $\alpha$ -(GS)<sub>n</sub>-R-2K substrate

MGSSHHHHHHSSGLVPR//GSHMTSPEERERMIKQLKEELRLEEAKLVLLKCLRQSQIQKEATAQKAS(GS)<sub>n</sub>GTPGSGSGSGSLRKASLGGGGGY

### 5. p66 $\alpha$ -(GS)<sub>n</sub>-R-3K substrate

MGSSHHHHHHSSGLVPR//GSHMTSPEERERMIKQLKEELRLEEAKLVLLKCLRQSQIQKEATAQKAS(GS)<sub>n</sub>GTPGSGSGSGSLKRASLGGGGGY

## Supplementary figures

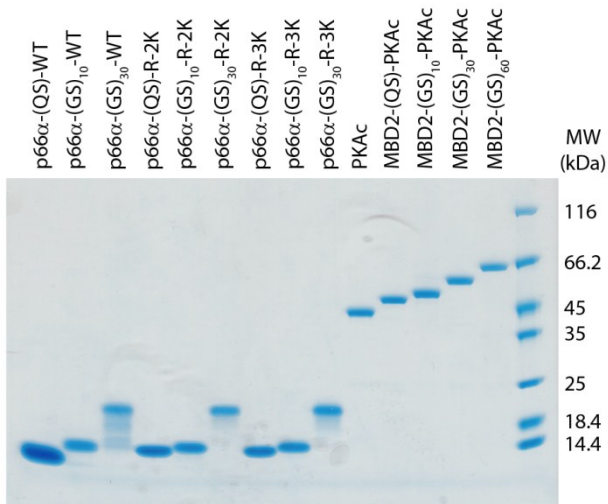

**Fig. S1: Protein variants used in this study.** SDS-PAGE gel of purified proteins. The substrates with a 120 residue GS linker (GS)<sub>60</sub> could not be purified to sufficient purity.

Next four pages:

**Fig. S2: Primary data from quench-flow experiments.** The data are fitted to one-phase association model using GraphPad Prism 8.3, with best-fit parameter values and standard errors shown for each experiment.

# PKA & S WT

Linker length:

1 mM ATP+ 5  $\mu$ M PKA & S

0.1 mM ATP+ 0.5  $\mu$ M PKA & S

20

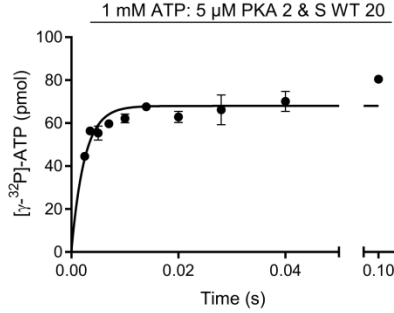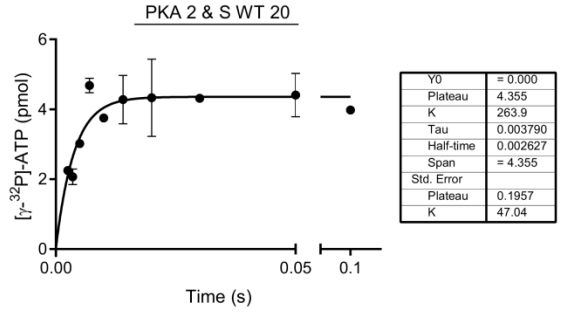

40

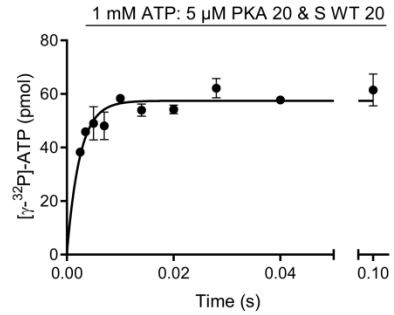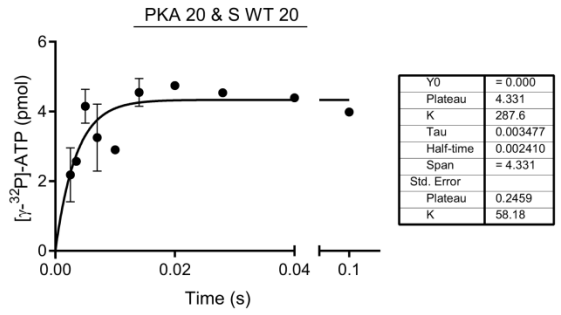

60

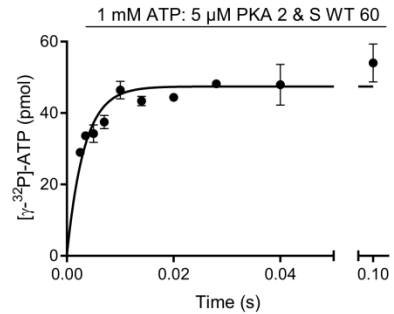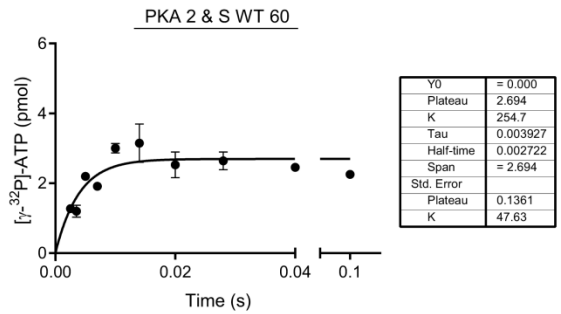

80

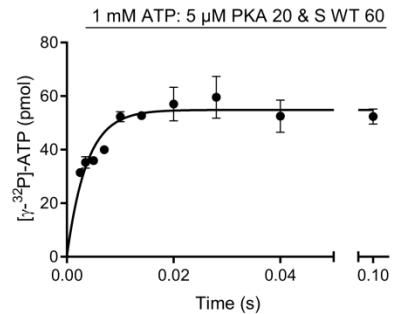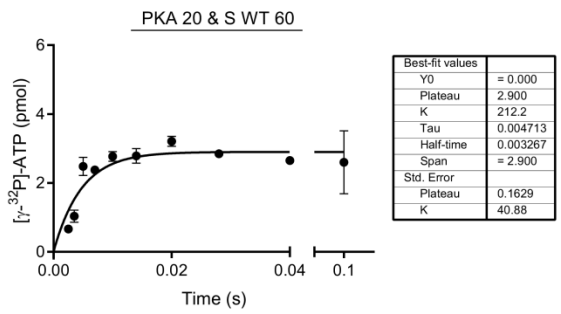

120

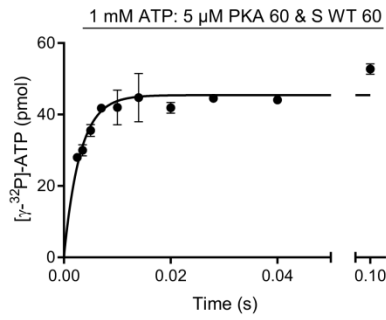

| Best-fit values |          |
|-----------------|----------|
| Y0              | = 0.000  |
| Plateau         | 45.42    |
| K               | 330.7    |
| Tau             | 0.003024 |
| Half-time       | 0.002096 |
| Span            | = 45.42  |
| Std. Error      |          |
| Plateau         | 1.109    |
| K               | 35.09    |

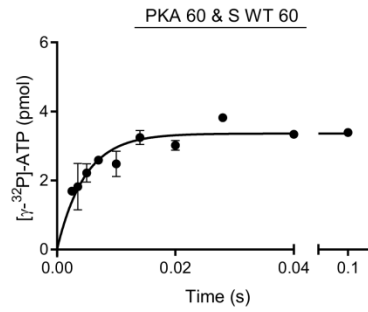

| Best-fit values |          |
|-----------------|----------|
| Y0              | = 0.000  |
| Plateau         | 3.357    |
| K               | 211.7    |
| Tau             | 0.004724 |
| Half-time       | 0.003275 |
| Span            | = 3.357  |
| Std. Error      |          |
| Plateau         | 0.1144   |
| K               | 25.64    |

180

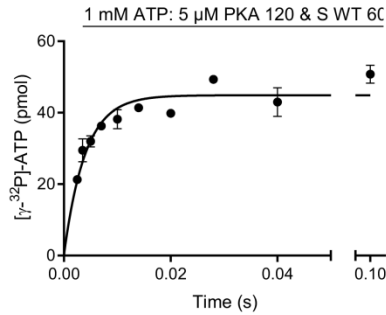

| Best-fit values |          |
|-----------------|----------|
| Y0              | = 0.000  |
| Plateau         | 44.89    |
| K               | 250.9    |
| Tau             | 0.003986 |
| Half-time       | 0.002763 |
| Span            | = 44.89  |
| Std. Error      |          |
| Plateau         | 1.229    |
| K               | 26.15    |

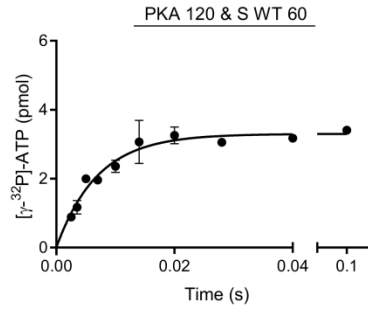

| Best-fit values |          |
|-----------------|----------|
| Y0              | = 0.000  |
| Plateau         | 3.296    |
| K               | 143.5    |
| Tau             | 0.006968 |
| Half-time       | 0.004830 |
| Span            | = 3.296  |
| Std. Error      |          |
| Plateau         | 0.09910  |
| K               | 13.37    |

not linked

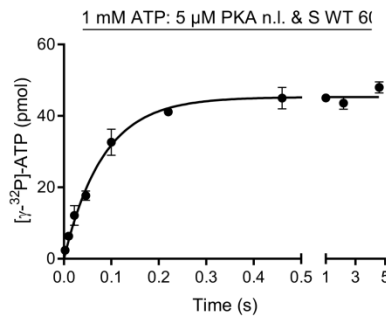

| Best-fit values |         |
|-----------------|---------|
| Y0              | = 0.000 |
| Plateau         | 45.27   |
| K               | 12.16   |
| Tau             | 0.08226 |
| Half-time       | 0.05702 |
| Span            | = 45.27 |
| Std. Error      |         |
| Plateau         | 0.7081  |
| K               | 0.7949  |

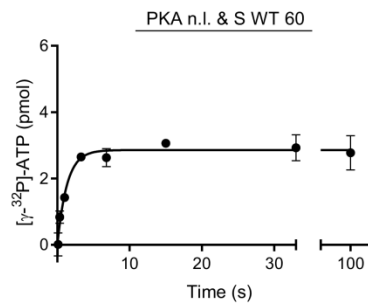

| Best-fit values |         |
|-----------------|---------|
| Y0              | = 0.000 |
| Plateau         | 2.857   |
| K               | 0.7487  |
| Tau             | 1.336   |
| Half-time       | 0.9259  |
| Span            | = 2.857 |
| Std. Error      |         |
| Plateau         | 0.09481 |
| K               | 0.1225  |

Linker length:

**PKA & S R-2K**

**PKA & S R-3K**

**0.1 mM ATP+ 0.5 μM PKA & S**

**0.1 mM ATP+ 0.5 μM PKA & S**

20

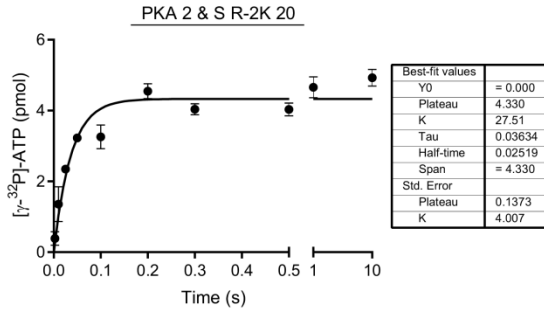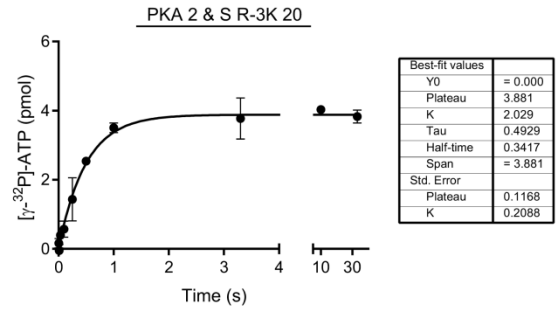

40

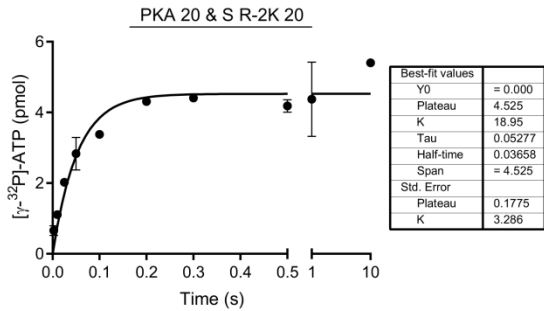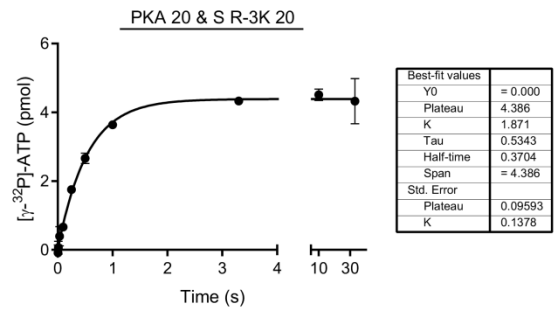

60

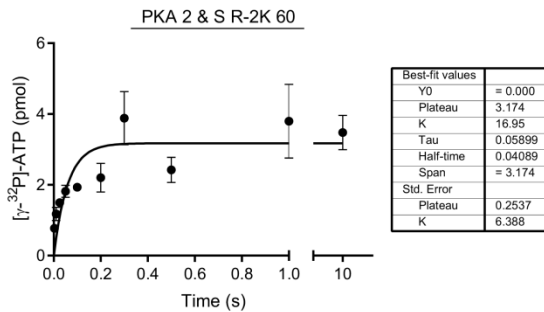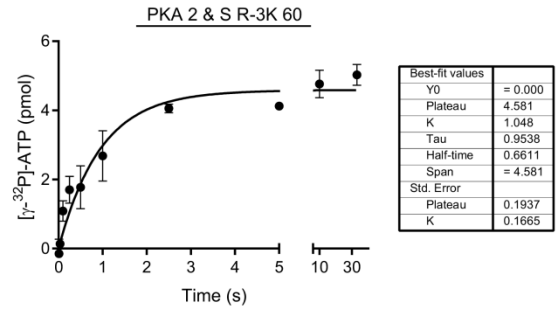

80

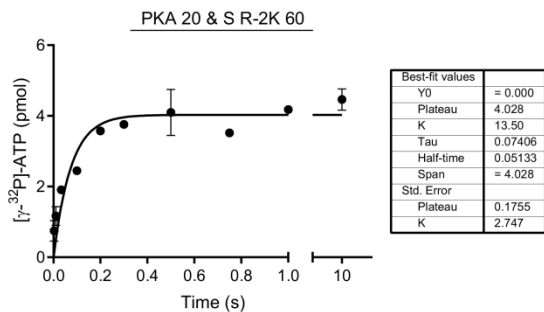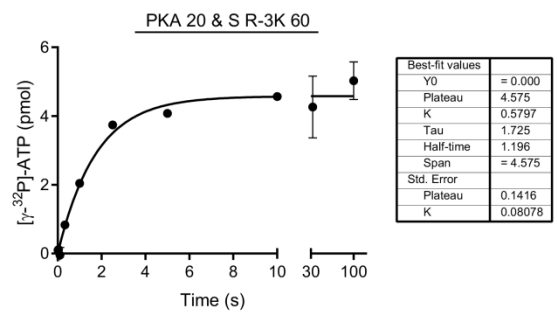

120

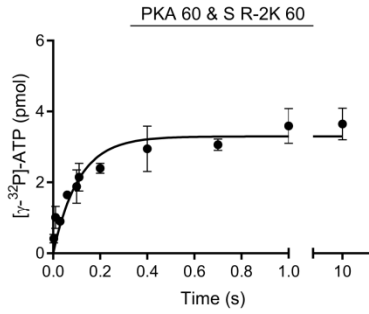

| Best-fit values |         |
|-----------------|---------|
| Y0              | = 0.000 |
| Plateau         | 3.297   |
| K               | 9.214   |
| Tau             | 0.1085  |
| Half-time       | 0.07522 |
| Span            | = 3.297 |
| Std. Error      |         |
| Plateau         | 0.1629  |
| K               | 1.538   |

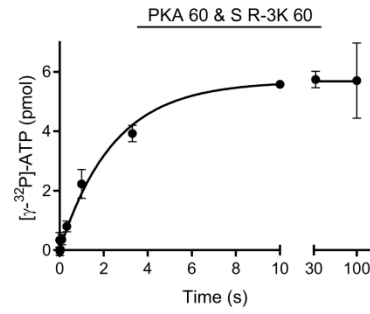

| Best-fit values |         |
|-----------------|---------|
| Y0              | = 0.000 |
| Plateau         | 5.680   |
| K               | 0.4094  |
| Tau             | 2.442   |
| Half-time       | 1.693   |
| Span            | = 5.680 |
| Std. Error      |         |
| Plateau         | 0.1846  |
| K               | 0.05113 |

180

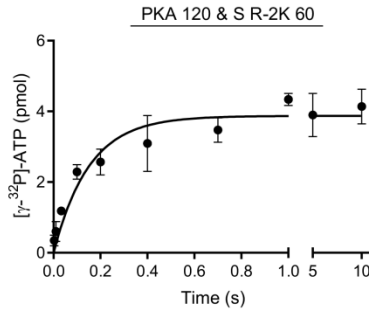

| Best-fit values |         |
|-----------------|---------|
| Y0              | = 0.000 |
| Plateau         | 3.872   |
| K               | 6.625   |
| Tau             | 0.1510  |
| Half-time       | 0.1046  |
| Span            | = 3.872 |
| Std. Error      |         |
| Plateau         | 0.1713  |
| K               | 1.276   |

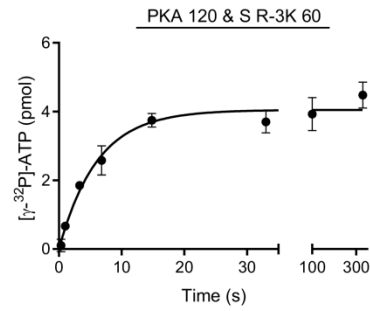

| Best-fit values |         |
|-----------------|---------|
| Y0              | = 0.000 |
| Plateau         | 4.046   |
| K               | 0.1644  |
| Tau             | 6.081   |
| Half-time       | 4.215   |
| Span            | = 4.046 |
| Std. Error      |         |
| Plateau         | 0.1284  |
| K               | 0.02013 |

not linked

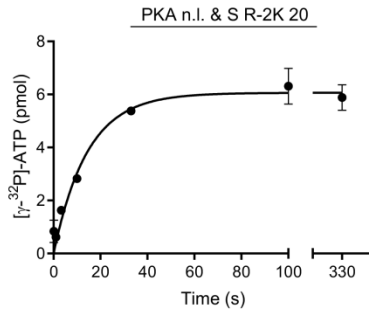

| Best-fit values |         |
|-----------------|---------|
| Y0              | = 0.000 |
| Plateau         | 6.061   |
| K               | 0.06950 |
| Tau             | 14.39   |
| Half-time       | 9.973   |
| Span            | = 6.061 |
| Std. Error      |         |
| Plateau         | 0.2303  |
| K               | 0.01012 |

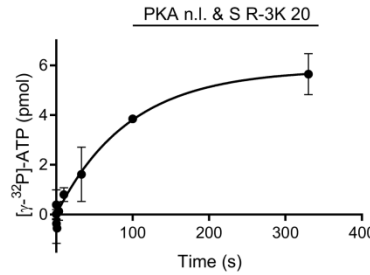

| Best-fit values |          |
|-----------------|----------|
| Y0              | = 0.000  |
| Plateau         | 5.833    |
| K               | 0.01056  |
| Tau             | 94.70    |
| Half-time       | 65.64    |
| Span            | = 5.833  |
| Std. Error      |          |
| Plateau         | 0.4792   |
| K               | 0.002252 |

### PKA & S R-3K

#### 1 mM ATP+ 5 μM PKA & S

60

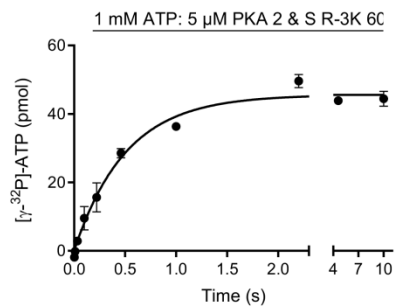

| Best-fit values |         |
|-----------------|---------|
| Y0              | = 0.000 |
| Plateau         | 45.58   |
| K               | 1.972   |
| Tau             | 0.5071  |
| Half-time       | 0.3515  |
| Span            | = 45.58 |
| Std. Error      |         |
| Plateau         | 1.113   |
| K               | 0.1746  |

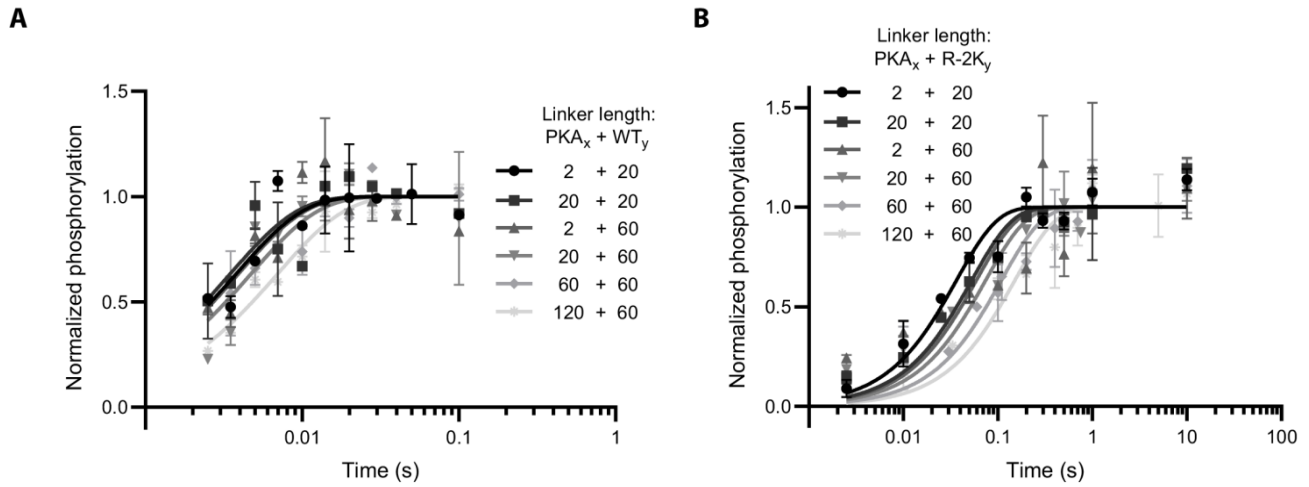

**Fig. S3: Linker dependence of single-turnover phosphorylation rates.** Quench-flow kinetics of the phosphorylation reactions of (A) WT and (B) R-2K substrate. The total linker length is a combination of contributions from GS-repeats in the two constructs labeled  $PKA_x$  and  $WT_y/R-2K_y$ , where x and y denote linker length in each construct, listed in the figure.  $k_{tet}$  is derived from a fit to one-phase association model (black and grey lines). Error bars indicate mean  $\pm$  s.d.,  $n = 2$ .



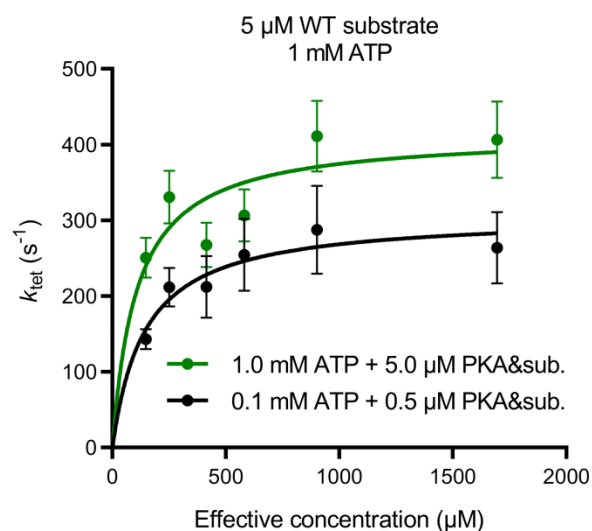

**Fig. S4: ATP dependence of the tethered reaction.** The ATP dependence of the tethered phosphorylation was tested at 1 mM ATP, whereas all other experiments were conducted at 100  $\mu$ M. The amount of  $[\gamma\text{-}^{32}\text{P}]\text{ATP}$  was already at maximally permitted level, so the protein concentration was also increased 10-fold to preserve the same signal to noise. Error bars correspond to standard error of the fit to one-phase association model

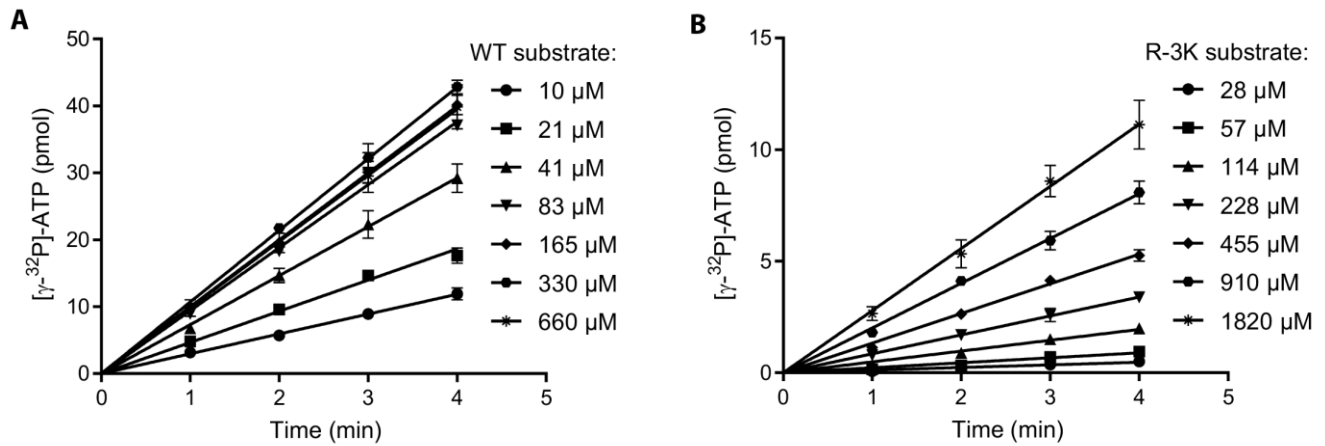

**Fig. S5: Quantifying the quality of PKA substrate variants.** Primary data from a steady-state kinetic experiment performed at 1 nM PKAc and an indicated concentration of (A) the p66 $\alpha$ -(QS)-WT substrate and (B) the p66 $\alpha$ -(QS)-R-3K substrate. Error bars indicate mean  $\pm$  s.d.,  $n = 3$ .

## Derivations of rate equations

### *Tethered system*

We consider a catalytical model where product release limits steady-state reaction rates and where phosphorylation and product release are two irreversible steps.

Moreover, we use saturating ATP concentrations and assume  $k_{\text{ATP binding}} \gg k_{\text{cat}}$ . Thus, we define the following states:

- O = open tethered system, bound ATP
- C = closed tethered system, bound ATP
- CP = closed, phosphorylated tethered system, bound ADP
- OP = open tethered system

The tethered system is composed of two interacting partners, and closure of this system is governed by effective concentration,  $C_{\text{eff}}$ :

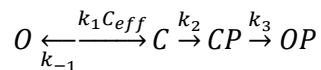

The Law of Mass Action applied to the model leads to the following system of nonlinear reaction equations:

$$\frac{d[O]}{dt} = -k_1 C_{\text{eff}}[O] + k_{-1}[C]$$

$$\frac{d[C]}{dt} = k_1 C_{\text{eff}}[O] - (k_{-1} + k_2)[C]$$

$$\frac{d[CP]}{dt} = k_2[C] - k_3[CP]$$

$$\frac{d[OP]}{dt} = k_3[CP]$$

In single turnover experiments both closed and open phosphorylated products are measured, hence:

$$P = CP + OP$$

$$\frac{d[P]}{dt} = \frac{d[CP]}{dt} + \frac{d[OP]}{dt} = k_2[C]$$

From the conservation law, total concentration of the tethered system is constant:

$$\frac{d[O]}{dt} + \frac{d[C]}{dt} + \frac{d[CP]}{dt} + \frac{d[OP]}{dt} = 0$$

$$[O] + [C] + [CP] + [OP] = [E]_T$$

$$[O] = [E]_T - [C] - [P]$$

Rapid equilibrium assumption for the open/closed complex:

$$\frac{d[O]}{dt} = 0$$

$$k_1 C_{eff}[O] = k_{-1}[C]$$

$$k_1 C_{eff}([E]_T - [C] - [P]) = k_{-1}[C]$$

$$k_{-1}[C] + k_1 C_{eff}[C] = k_1 C_{eff}[E]_T - k_1 C_{eff}[P]$$

$$[C] = \frac{k_1 C_{eff}[E]_T - k_1 C_{eff}[P]}{k_{-1} + k_1 C_{eff}} = \frac{C_{eff}[E]_T - C_{eff}[P]}{\frac{k_{-1}}{k_1} + C_{eff}}$$

Given  $K_d = \frac{k_{-1}}{k_1}$ :

$$[C] = \frac{C_{eff}[E]_T - C_{eff}[P]}{K_d + C_{eff}}$$

Substituting  $[C]$  into the product formation equation:

$$\frac{d[P]}{dt} = k_2[C] = k_2 \frac{C_{eff}[E]_T - C_{eff}[P]}{K_d + C_{eff}}$$

Integrate product formation rate:

$$\frac{d[P]}{dt} = -\frac{k_2 C_{eff}}{K_d + C_{eff}} [P] + \frac{k_2 C_{eff}[E]_T}{K_d + C_{eff}}$$

$$\frac{1}{-\frac{k_2 C_{eff}}{K_d + C_{eff}} [P] + \frac{k_2 C_{eff}[E]_T}{K_d + C_{eff}}} d[P] = dt$$

$$\int_0^{[P]} \frac{1}{-\frac{k_2 C_{eff}}{K_d + C_{eff}} [P] + \frac{k_2 C_{eff}[E]_T}{K_d + C_{eff}}} d[P] = \int_0^t dt$$

$$-\frac{K_d + C_{eff}}{k_2 C_{eff}} \ln \left| -\frac{k_2 C_{eff}}{K_d + C_{eff}} [P] + \frac{k_2 C_{eff}[E]_T}{K_d + C_{eff}} \right| + \frac{K_d + C_{eff}}{k_2 C_{eff}} \ln \left| -\frac{k_2 C_{eff}}{K_d + C_{eff}} \cdot 0 + \frac{k_2 C_{eff}[E]_T}{K_d + C_{eff}} \right| = t - 0$$

$$\ln \left| \frac{k_2 C_{eff} ([E]_T - [P])}{K_d + C_{eff}} \right| - \ln \left| \frac{k_2 C_{eff} [E]_T}{K_d + C_{eff}} \right| = - \frac{k_2 C_{eff}}{K_d + C_{eff}} t$$

$$\ln \left| \frac{[E]_T - [P]}{[E]_T} \right| = - \frac{k_2 C_{eff}}{K_d + C_{eff}} t$$

$$\frac{[E]_T - [P]}{[E]_T} = e^{-\frac{k_2 C_{eff}}{K_d + C_{eff}} t}$$

Formation of phosphorylated product is described by the following equation:

$$[P] = [E]_T \left( 1 - e^{-\frac{k_2 C_{eff}}{K_d + C_{eff}} t} \right)$$

Phosphorylation rates in the tethered system obtained from quench flow measurements ( $k_{tet}$ ) are dependent on effective concentration:

$$k_{tet} = \frac{k_2 C_{eff}}{K_d + C_{eff}}$$

### Untethered system

We consider a catalytical model where product release limits steady-state reaction rates and where phosphorylation and product release are two irreversible steps.

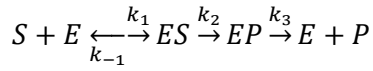

The Law of Mass Action applied to the model leads to the following system of nonlinear reaction equations:

$$\frac{d[S]}{dt} = -k_1[S][E] + k_{-1}[ES]$$

$$\frac{d[E]}{dt} = -k_1[S][E] + k_{-1}[ES] + k_3[EP]$$

$$\frac{d[ES]}{dt} = k_1[S][E] - (k_{-1} + k_2)[ES]$$

$$\frac{d[EP]}{dt} = k_2[ES] - k_3[EP]$$

$$\frac{d[P]}{dt} = k_3[EP]$$

From the conservation law for the enzyme, total enzyme concentration is constant:

$$\frac{d[E]}{dt} + \frac{d[ES]}{dt} + \frac{d[EP]}{dt} = 0$$

$$[E] + [ES] + [EP] = [E]_0$$

$$[E] = [E]_0 - [ES] - [EP]$$

Rapid equilibrium assumption:

$$\frac{d[S]}{dt} = 0$$

$$k_1[S][E] = k_{-1}[ES]$$

$$k_1[S]([E]_0 - [ES] - [EP]) = k_{-1}[ES]$$

$$k_1[S][E]_0 - k_1[S][EP] = k_{-1}[ES] + k_1[S][ES]$$

$$[ES] = \frac{k_1[S][E]_0 - k_1[S][EP]}{k_1[S] + k_{-1}}$$

Quasi-steady-state approximation of the  $[EP]$  complex:

$$\frac{d[EP]}{dt} = 0$$

$$k_2[ES] - k_3[EP] = 0$$

$$\frac{k_3[EP]}{k_2} = [ES]$$

$$\frac{k_3[EP]}{k_2} = \frac{k_1[S][E]_0 - k_{-1}[S][EP]}{k_1[S] + k_{-1}}$$

$$k_1 k_3 [S][EP] + k_{-1} k_3 [EP] = k_1 k_2 [S][E]_0 - k_1 k_2 [S][EP]$$

$$[EP]([S]k_1(k_2 + k_3) + k_{-1}k_3) = k_1 k_2 [S][E]_0$$

$$[EP] = \frac{k_1 k_2 [S][E]_0}{[S]k_1(k_2 + k_3) + k_{-1}k_3}$$

$$[EP] = \frac{\frac{k_2[S][E]_0}{k_2 + k_3}}{[S] + \frac{k_{-1}k_3}{k_1(k_2 + k_3)}}$$

Given  $K_d = \frac{k_{-1}}{k_1}$ :

$$[EP] = \frac{\frac{k_2[S][E]_0}{k_2 + k_3}}{[S] + K_d \frac{k_3}{k_2 + k_3}}$$

Finally, substituting  $[EP]$  into the product formation equation:

$$\frac{d[P]}{dt} = k_3[EP] = \frac{\frac{k_2 k_3}{k_2 + k_3} [S][E]_0}{[S] + K_d \frac{k_3}{k_2 + k_3}}$$

Hence:

$$k_{cat} = \frac{k_2 k_3}{k_2 + k_3}$$

$$K_M = K_d \frac{k_3}{k_2 + k_3}$$
